# Supplementary material for: Multiple-decked Gd(iii) complexes induced by hydrogen bonds depending on anions
Source: Royal Society of Chemistry journal article supplement (doi:10.1039/b614511f), 2006-11-20
Supplement: b614511f.pdf [file b614511f.pdf]

## Supplementary information

### Multiple-decked Gd(III) Complexes Induced by Hydrogen Bonds Depending on Anions

Kyoung-Tae Youm,<sup>a</sup> Hyun Kyung Woo,<sup>a</sup> Jaejung Ko,<sup>\*b</sup> and Moo-Jin Jun <sup>\*a</sup>

<sup>a</sup> Department of Chemistry, Yonsei University, Seoul 120-749, Korea. Fax: +82 2 364 7050; Tel: +82 2 2123 2639; E-mail: mjjun@yonsei.ac.kr

<sup>b</sup> Departments of Chemistry, Korea University, Chochiwon, Chugnam 339-700, Korea.

#### 1. General procedures

Thermal gravimetric analysis was recorded on a Shimadzu TGA-50H in nitrogen atmosphere. Temperature ranges from 25 °C to 500 °C and is elevated at 10.0 °C / min. The arrangement used to measure magnetic susceptibility by using a Quantum Design/MPMS SQUID (superconducting quantum interface device). SQUID data were collected 5 k from 300 K at 5000 G.

#### 2. Single crystal X-ray analysis.

##### 2-1. {[Gd(btp)(H<sub>2</sub>O)<sub>4</sub>(NO<sub>3</sub>)<sub>2</sub>]·2btp·H<sub>2</sub>O·MeOH·NO<sub>3</sub>} (1)

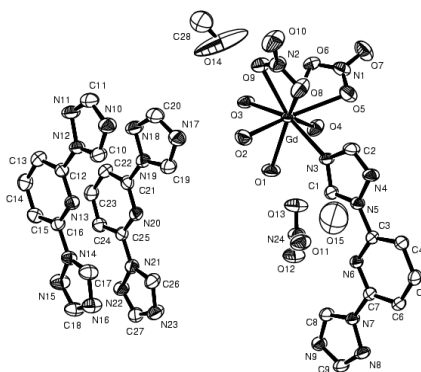

Fig. S1 ORTEP drawing of asymmetric unit of **1**. All the hydrogen atoms are omitted for clarity.

By single X-ray structure analysis represent that the asymmetric unit of complex (**1**) is composed of one Gd ion, five H<sub>2</sub>O molecules, one methanol, three nitrate ions and three btp molecules. The coordination number of Gd ion is nine in which two nitrate ions chelate Gd in a  $\eta^2$ -mode and four H<sub>2</sub>O and N atoms from btp bind directly Gd center. The first shell around Gd is arranged in tricapped-trigonal-prismatic architecture.

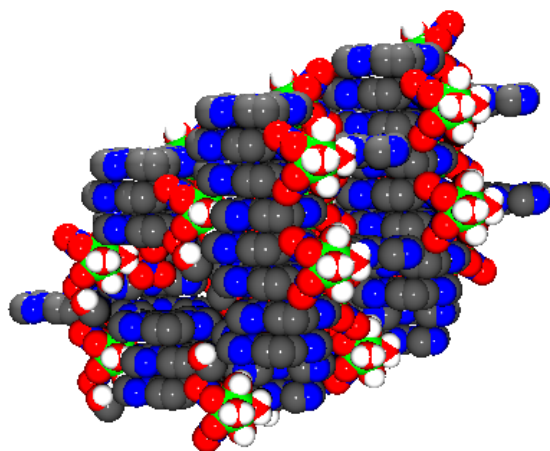

Fig. S2. Space filling diagram presenting  $\pi$ - $\pi$  stacking pattern of dimeric **1**.

**2-2.**  $\{[\text{Gd}(\text{btp})(\text{H}_2\text{O})_3(\text{MeOH})(\text{NO}_3)_2] \cdot 2\text{btp} \cdot \text{MeOH} \cdot \text{ClO}_4\}$  (**2**)

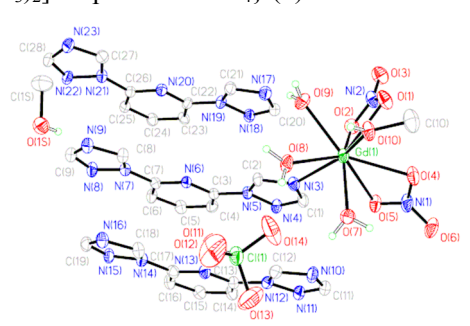

Fig. S3. ORTEP drawing of asymmetric unit of **2**.

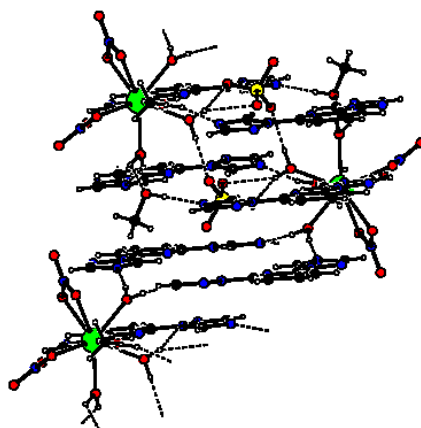

Fig. S4 Hydrogen bond patterns propagating in 1dimensional direction.

**3. Magnetic susceptibility study**

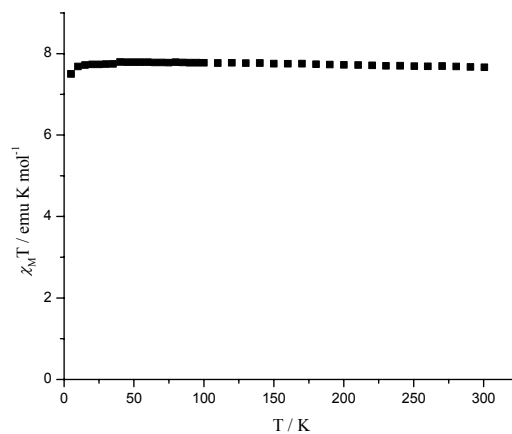

Fig. S5.  $X_M T$  vs  $T$  curve for **1**

The variable-temperature magnetic susceptibility of **1** in the range 5-300 K reveal that there is no magnetic interaction between Gd(III) centres. The  $X_M T$  of 7.83~7.89 emu K mol<sup>-1</sup> per Gd(III) of **1** is, within error, identical to the spin-only value of 7.88 emu K mol<sup>-1</sup>. These data are in agreement with the large separation distances between the neighboring magnetic centres (10.66 Å).
